# Supplementary material for: Reminder-Focused Positive Psychiatry: Suicide Prevention Among Youths With Comorbid Posttraumatic Stress Disorder and Suicidality
Source: Atypon-hosted journal article supplement (doi:10.1176/appi.psychotherapy.20200061), 2022-07-29
Supplement: appi.psychotherapy.20200061.ds001.pdf [file appi.psychotherapy.20200061.ds001.pdf]

Data supplement for Ahmadi et al., Reminder-Focused Positive Psychiatry: Suicide Prevention Among Youths With Comorbid Posttraumatic Stress Disorder and Suicidality. *Am J Psychother* (doi: 10.1176/appi.psychotherapy.20200061)

| <b>Positive Skills in Reminder-Focused Positive Psychiatry and Suicide Prevention Intervention (RFPP-S)</b> |                                                                                                                                                                                                                                                                             |
|-------------------------------------------------------------------------------------------------------------|-----------------------------------------------------------------------------------------------------------------------------------------------------------------------------------------------------------------------------------------------------------------------------|
| <b>Module</b>                                                                                               | <b>Therapeutic Messaging/Techniques</b>                                                                                                                                                                                                                                     |
| <b>Self-Compassion</b>                                                                                      | Accept yourself, including your suffering, thoughts, and feelings. Notice that each of your unwanted thoughts is just one of many ways to think about your situation.                                                                                                       |
| <b>Treatment Engagement</b>                                                                                 | Your passionate and purposeful interactions with others can improve your positive feelings and interpersonal relationships.                                                                                                                                                 |
| <b>Managing Trauma/Loss Reminders</b>                                                                       | Label trauma/loss reminders with silly names. Call out the silly name when reminded of the trauma, followed by gratitude and self-compassion.                                                                                                                               |
| <b>Distress Tolerance</b>                                                                                   | Think about a time in your life when something bad happened and practice distress tolerance skills.                                                                                                                                                                         |
| <b>Safety Planning Skills</b>                                                                               | When you think of death or suicide, tell your parents “I am sad; make me happy.” They are aware of your triggers and will work with you through self-compassion, gratitude, and engagement exercises for 30 minutes or more until this wave of emotion crests and subsides. |
| <b>Parent Psychoeducation</b>                                                                               | Parents should practice handling trauma reminders with their child, using techniques of self-compassion, gratitude, resilience, and engagement exercises.                                                                                                                   |
